# Supplementary material
Source: publisher figshare collection journal article supplement (https://tandf.figshare.com/ndownloader/files/13005149)
Supplement: Supplementary file 1 [file 13005149]

**Electronic supplementary information**

Peculiarities of NMR Relaxation in Micellar Gels of Pluronic F-127

**Anatoly Butakov,a Andrei Filippov,b,c* Roustam Gimatdinovd and Vladimir Chernova**

aRadiophysics and Electronics, Chelyabinsk State University, Chelyabinsk 454001, Russia

bChemistry of Interfaces, Luleå University of Technology, Luleå SE-97187, Sweden

cInstitute of Physics, Kazan Federal University, 420008, Kazan, Russia

dMedical and Biological Physics, Kazan Medical University, 420012, Kazan, Russia

*Corresponding author, [Andrey.Filippov@kpfu.ru](mailto:Andrey.Filippov@kpfu.ru)


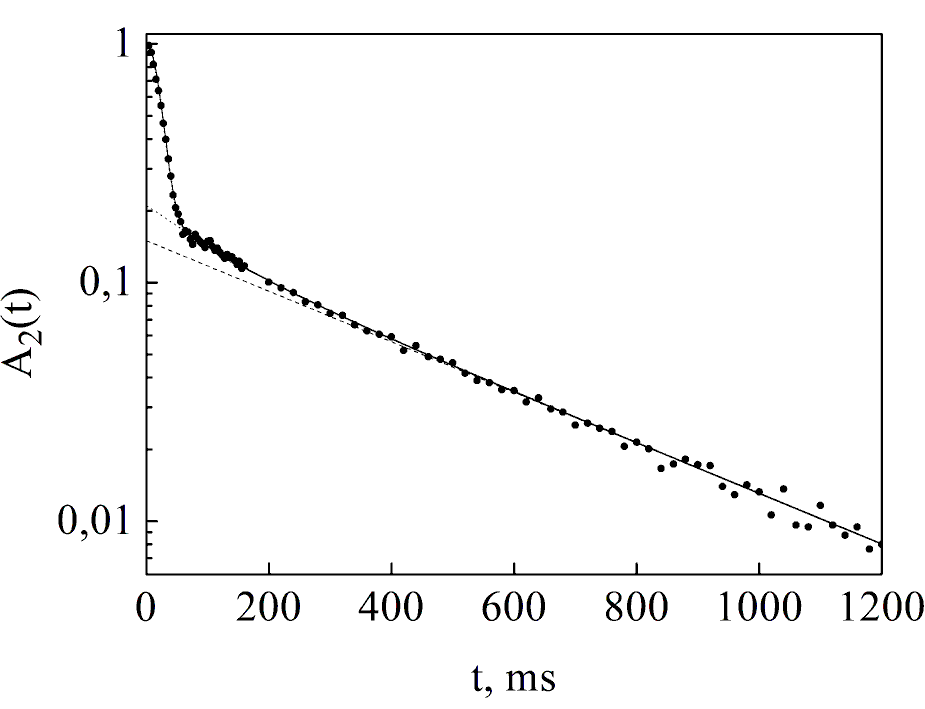


**Figure S1** Decay of transverse magnetization for Sample 2 at 40° С (rigid gel-phase). The solid line is the approximation of the whole decay, the dashed line corresponds to the slowly-relaxing component, and the dotted line is the sum of intermediate-relaxing and slowly-relaxing components.


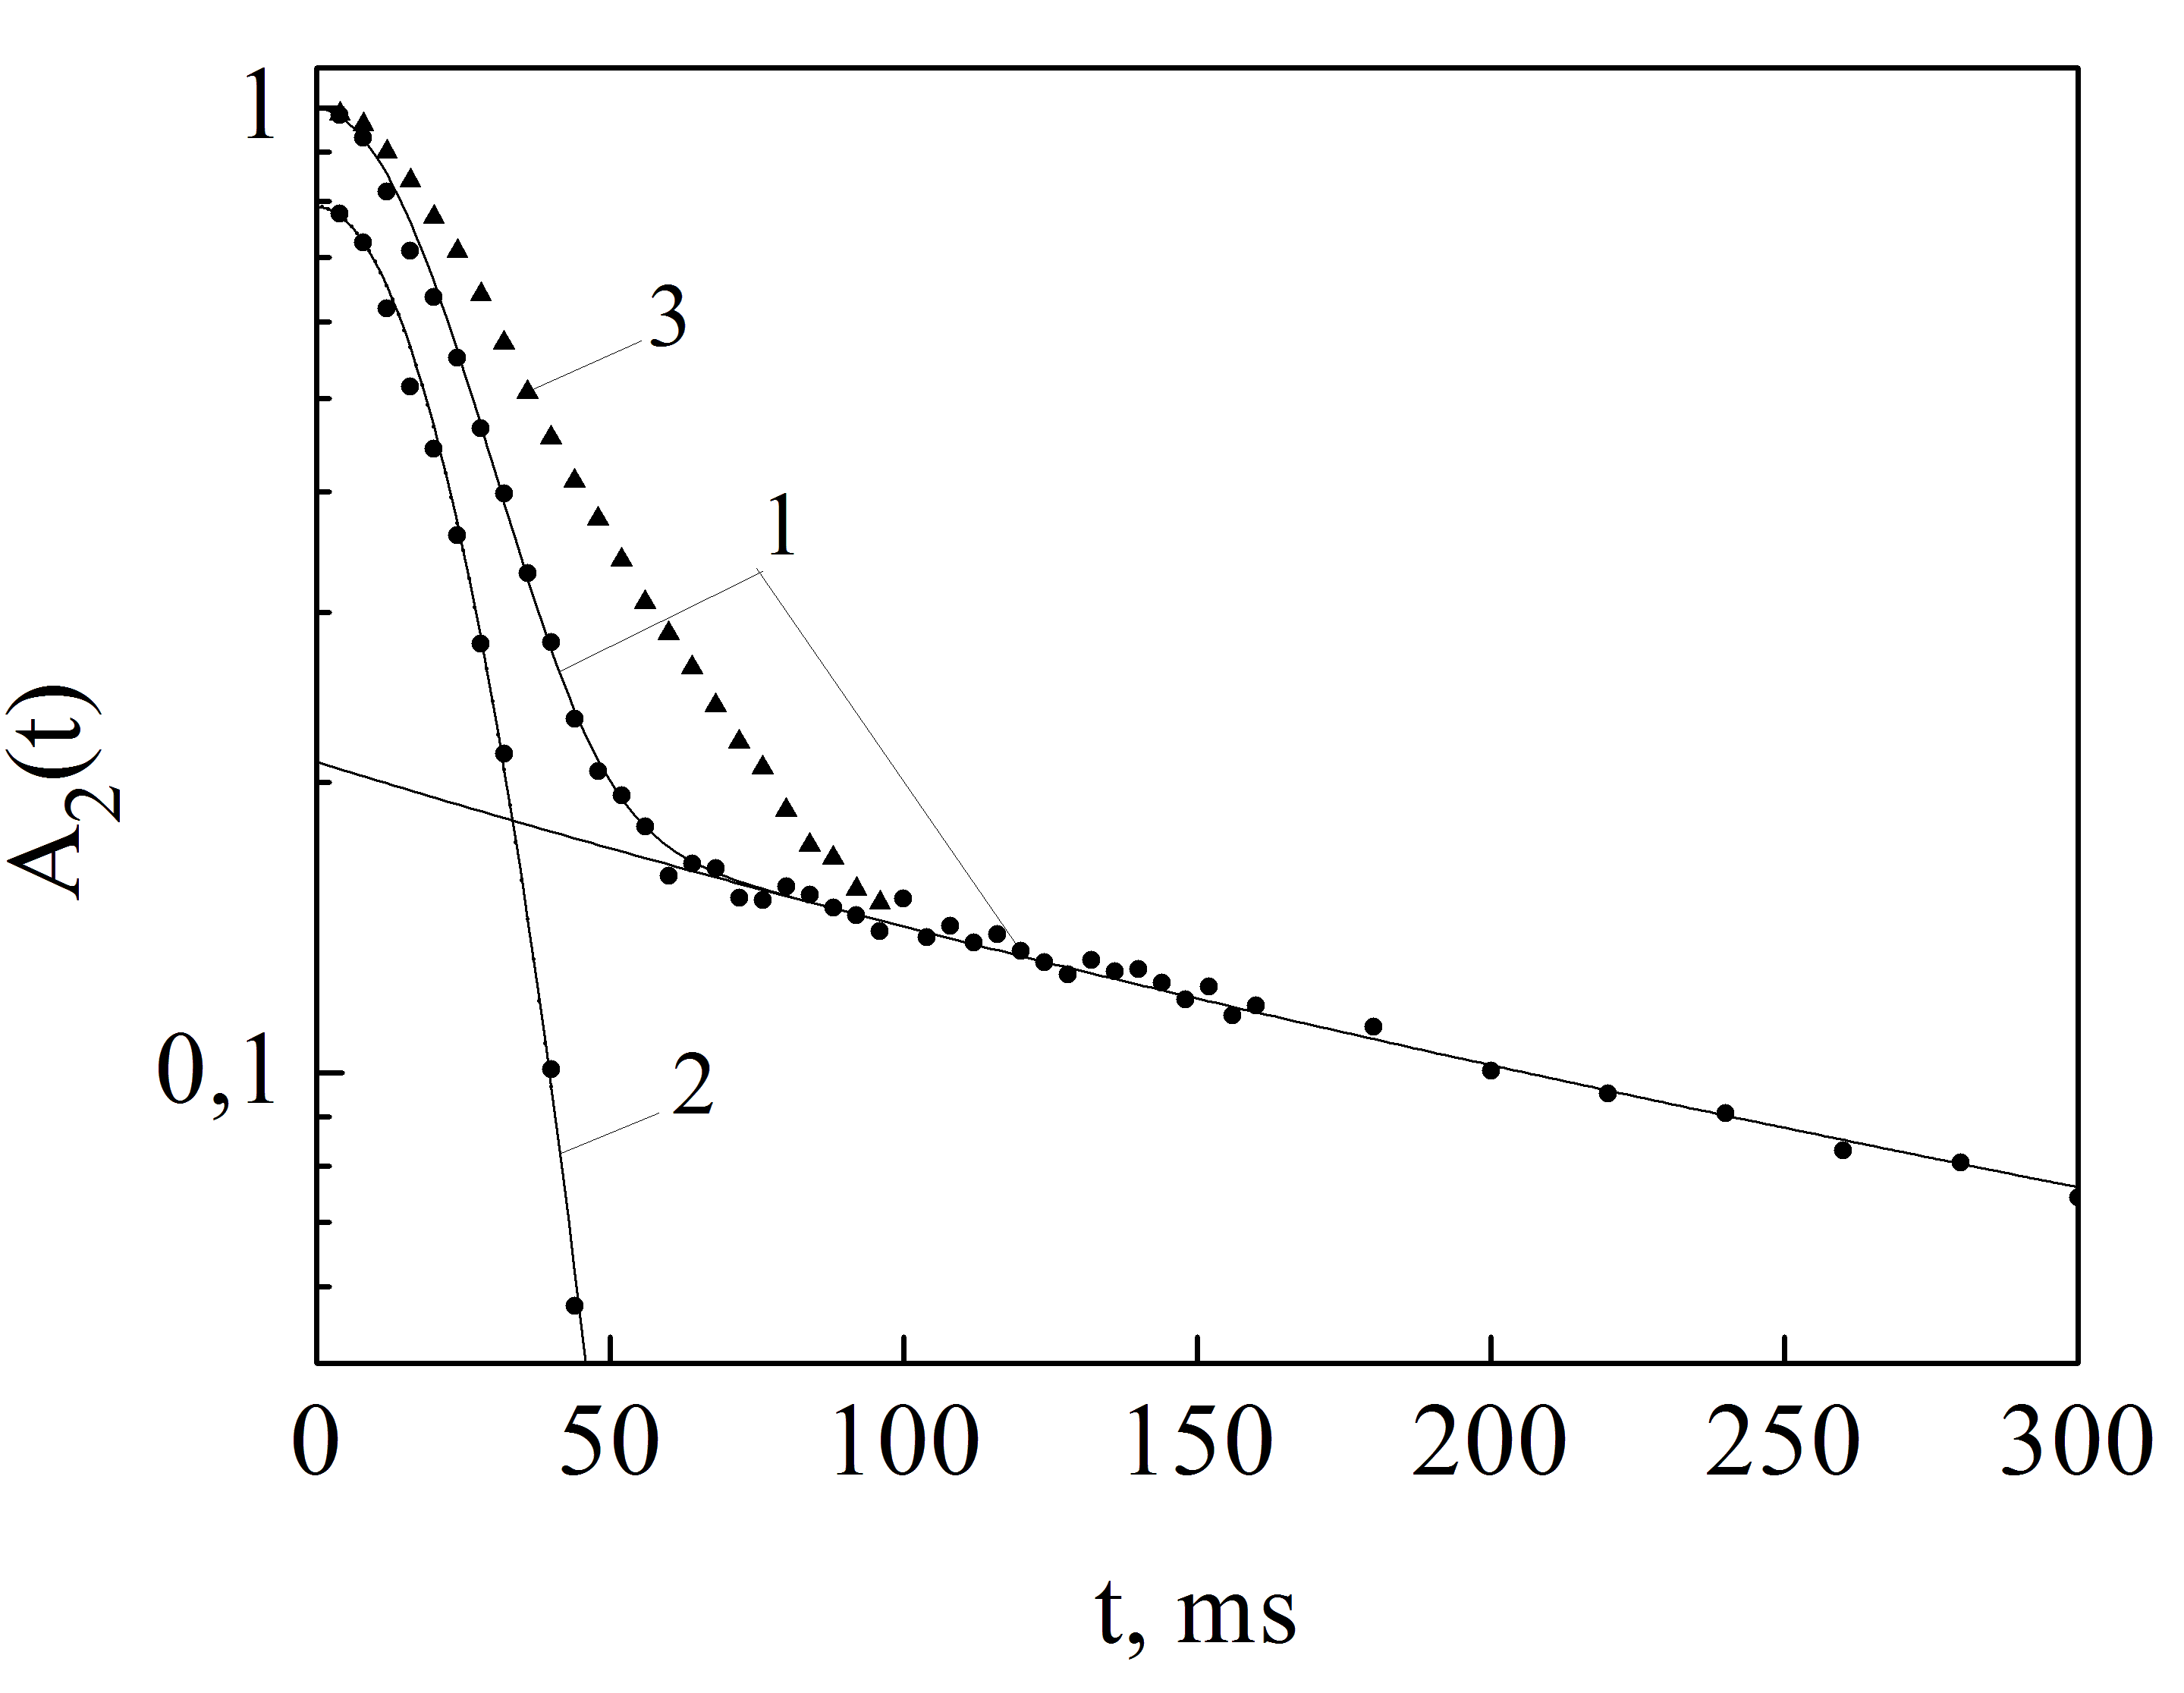


**Figure S2** Initial part of the transverse magnetization decay (1), fast-relaxing Gaussian component of the decay obtained after subtraction of slowly-relaxing and intermediate-relaxing components from the initial decay (2) and envelope of signal of solid-echo (3) for Sample 2 at 40 °С (rigid gel-phase).
